# Supplementary material
Source: publisher figshare collection journal article supplement (https://karger.figshare.com/ndownloader/files/22031490)
Supplement: Supplementary file 1 [file 22031490]

## Sheet: Munka1
Supplementary file 1. Morphological and statistical data of the wheat/Triticale dwarf (D) and semidwarf (SD) lines
	Plant height (cm)	Tillering (spikes/plant)	Length of the main spike (cm)	Spikelets/main spike	Head density	Seeds/main spike	Weight of main spike seeds (g)	Thousand kernel weight (g)
373D X±Sx	59.30±4.92	6.70±1.16	13.56±0.46	21.40±0.70	15.07±0.07	80.00±8.69	3.18±0.47	39.74±3.81
m	1.56	0.37	0.15	0.22	0.02	2.75	0.15	1.2
Cv	8.3	17.31	3.41	3.27	4.56	10.86	14.73	9.59
min ÷ max	53 ÷ 65	5 ÷ 8	12.8 ÷ 14.2	21 ÷ 23	14.1 ÷ 16.0	62 ÷ 89	2.4 ÷ 3.8	33.7 ÷ 45.2
374D X±Sx	54.50±6.57	7.70±2.31	12.79±0.99	21.80±1.62	16.30±0.11	77.80±10.94	2.96±0.43	38.14±3.21
m	2.08	0.73	0.31	0.51	0.04	3.46	0.14	1.02
Cv	12.06	30.02	7.72	7.43	6.94	14.06	14.32	8.43
min ÷ max	46 ÷ 64	4 ÷ 11	11.4 ÷ 14.2	19 ÷ 23	14.4 ÷ 18.5	53 ÷ 93	2.0 ÷ 3.4	32.5 ÷ 42.7
375SD X±Sx	79.90±3.54	8.70±2.63	15.13±1.40	26.20±1.69	16.71±0.10	34.30±11.49	1.76±0.64	50.90±3.15
m	1.12	0.83	0.44	0.53	0.03	3.63	0.2	1
Cv	4.43	30.19	9.28	6.44	6.16	33.5	35.81	6.19
min ÷ max	75 ÷ 85	4 ÷ 12	13.2 ÷ 18.0	24 ÷ 29	15.0 ÷ 18.0	17 ÷ 53	0.8 ÷ 2.9	47.1 ÷ 56.7
376D X±Sx	59.10±6.28	8.70±1.83	10.39±0.43	21.60±1.07	19.85±0.12	65.20±7.48	1.82±0.36	27.70±2.65
m	1.98	0.58	0.14	0.34	0.21	2.36	0.12	0.84
Cv	10.62	21.02	4.14	4.98	49.19	11.47	20.29	9.56
min ÷ max	50 ÷ 65	7 ÷ 12	9.6 ÷ 11.0	20 ÷ 23	17.8 ÷ 21.8	50 ÷ 74	1.2 ÷ 2.4	24.5 ÷ 31.5
377SD X±Sx	64.20±8.97	5.60±0.70	12.24±0.66	18.70±1.70	14.44±0.09	66.70±10.82	2.06±0.44	30.68±1.99
m	2.84	0.22	0.21	0.54	0.03	3.42	0.14	0.63
Cv	13.97	12.49	5.41	9.11	6.15	16.22	20.94	6.47
min ÷ max	52 ÷ 76	4 ÷ 6	11.4 ÷ 13.7	17 ÷ 22	13.1 ÷ 16.0	48 ÷ 86	1.3 ÷ 2.8	27.1 ÷ 33.3
378/1SD X± Sx	72.40±2.84	5.70±0.48	14.78±0.64	24.50±1.58	15.90±0.08	55.20±12.90	2.64±0.64	47.72±6.10
m	0.9	0.15	0.2	0.5	0.02	4.08	0.2	1.93
Cv	3.92	8.47	4.31	6.45	4.97	23.37	24.46	12.79
min ÷ max	68 ÷ 75	5 ÷ 6	14.0 ÷ 16.0	22 ÷ 27	14.5 ÷ 16.7	26 ÷ 72	1.0 ÷ 3.2	38.5 ÷ 63.0
378/3SD X± Sx	66.50±5.30	16.00±2.87	13.24±1.52	22.40±4.79	16.07±0.29	18.00±5.75	0.39±0.30	22.93±9.70
m	1.67	0.91	0.48	1.51	0.09	1.82	0.09	3.07
Cv	7.96	17.92	11.48	21.4	18	31.97	75	42.38
min ÷ max	60 ÷ 75	14 ÷ 20	10.5 ÷ 15.0	12 ÷ 28	10.5 ÷ 20.8	12 ÷ 29	0.1 ÷ 0.9	5.3 ÷ 33.3
380SD X±Sx	64.00±3.46	8.50±2.01	16.18±0.43	23.90±0.99	14.16±0.06	67.90±6.61	2.27±0.36	33.33±3.26
m	1.1	0.64	0.14	0.31	0.02	2.09	0.11	1.03
Cv	5.41	23.69	2.68	4.16	4.63	9.73	15.54	9.78
min ÷ max	60 ÷ 70	5 ÷ 11	15.7 ÷ 17.0	23 ÷ 25	13.3 ÷ 15.3	59 ÷ 80	1.8 ÷ 2.8	29.0 ÷ 38.5
382D X±Sx	55.40±4.40	14.80±0.92	11.33±0.74	18.30±1.34	15.27±0.07	73.10±6.95	2.63±0.32	36.01±3.14
m	1.39	0.29	0.23	0.42	0.02	2.2	0.1	0.99
Cv	7.94	6.21	6.51	7.31	4.51	9.51	12.36	8.72
min ÷ max	50 ÷ 65	13 ÷ 16	10.0 ÷ 12.5	17 ÷ 21	14.3 ÷ 16.0	64 ÷ 85	2.3 ÷ 3.3	30.7 ÷ 40.6
383/1SD X± Sx	67.00±3.62	12.75±2.66	14.15±0.62	20.75±0.89	13.97±0.06	34.25±4.27	2.25±0.17	46.64±4.13
m	1.28	0.94	0.22	0.31	0.02	1.51	0.06	1.46
Cv	5.41	20.78	4.41	4.27	4.15	12.48	14.08	11.29
min ÷ max	65 ÷ 71	8 ÷ 16	13.4 ÷ 15.2	20 ÷ 22	13.0 ÷ 14.9	28 ÷ 40	1.9 ÷ 2.4	42.1 ÷ 52.4
383/2SD X± Sx	65.20±3.71	9.40±2.01	16.17±0.89	23.00±2.21	13.65±0.16	56.40±19.69	1.58±0.60	27.98±2.48
m	1.17	0.64	0.28	0.7	0.05	6.23	0.19	0.78
Cv	5.68	21.39	5.49	9.61	11.71	34.92	37.38	8.87
min ÷ max	60 ÷ 72	6 ÷ 12	14.9 ÷ 17.5	19 ÷ 26	10.3 ÷ 15.9	19 ÷ 73	0.5 ÷ 2.3	23.7 ÷ 31.8
384/1D X±Sx	58.10±2.02	9.10±2.51	12.90±0.70	18.80±1.40	13.80±0.07	76.80±5.94	2.54±0.31	43.00±2.06
m	0.64	0.8	0.22	0.44	0.02	1.88	0.1	0.65
Cv	3.48	27.63	5.44	7.44	5.38	7.73	12.22	6.25
min ÷ max	55 ÷ 61	5 ÷ 12	11.5 ÷ 13.8	16 ÷ 21	13.0 ÷ 15.3	64 ÷ 86	2.0 ÷ 2.9	46.2 ÷ 49.5
384/2D X±Sx	57.30±1.77	8.90±2.02	12.78±0.97	18.10±1.37	13.39±0.06	68.50±4.90	3.13±0.20	41.11±2.11
m	0.56	0.64	0.31	0.43	0.02	1.55	0.06	0.67
Cv	3.08	22.75	7.57	7.57	4.34	7.16	9.66	6.79
min ÷ max	55 ÷ 61	6 ÷ 11	11.5 ÷ 14.4	16 ÷ 21	12.7 ÷ 14.1	63 ÷ 75	2.8 ÷ 3.4	37.4 ÷ 43.3
385D X±Sx	59.20±2.04	9.70±2.21	13.50±0.96	21.40±1.84	15.12±0.11	69.30±9.98	2.41±0.69	34.21±5.09
m	0.65	0.7	0.3	0.58	0.03	3.16	0.22	1.61
Cv	3.45	22.82	7.14	8.59	7.19	14.4	28.7	14.88
min ÷ max	55 ÷ 63	6 ÷ 13	12.0 ÷ 15.6	19 ÷ 24	14.3 ÷ 17.2	57 ÷ 84	1.5 ÷ 3.7	26.3 ÷44.1
386/1D X±Sx	55.20±3.39	10.00±3.56	13.04±0.85	18.80±1.55	13.65±0.08	65.40±7.83	3.50±0.44	48.00±2.58
m	1.07	1.12	0.27	0.49	0.02	2.48	0.14	0.82
Cv	6.15	35.59	6.51	8.24	5.83	11.98	17.69	6.8
min ÷ max	55 ÷ 60	4 ÷ 15	11.4 ÷ 14.4	17 ÷ 21	12.4 ÷ 14.5	53 ÷ 79	2.8 ÷ 4.2	44.0 ÷ 52.2
387SD X±Sx	64.80±5.31	9.40±3.20	12.82±0.90	17.80±1.32	13.11±0.07	56.80±9.83	2.01±0.56	34.86±5.91
m	1.68	1.01	0.29	0.42	0.02	3.11	0.18	1.87
Cv	8.19	34.09	7.05	7.4	5.48	17.31	28.14	16.93
min ÷ max	58 ÷ 73	4 ÷ 14	11.4 ÷ 13.8	16 ÷ 19	12.1 ÷ 14.5	44 ÷ 73	0.9 ÷ 2.8	20.4 ÷ 41.5
625D X±Sx	58.20±2.53	7.50±1.72	15.22±0.93	20.40±1.58	12.75±0.08	59.90±10.52	2.59±0.48	43.36±4.14
m	0.8	0.54	0.3	0.5	0.02	3.33	0.15	1.31
Cv	4.35	22.88	6.14	7.73	6.17	17.57	18.62	9.53
min ÷ max	54 ÷ 60	4 ÷ 10	13.6 ÷ 16.3	17 ÷ 22	12.1 ÷ 14.5	40 ÷ 75	1.9 ÷ 3.2	34.5 ÷ 48.5
The data included in the file are mean values of 10 plants analysed in three different generations, respectively. According to Jakubziner (1973) the plant height of 40-60 cm and 61-80 cm are considered as D and SD, respectively. (X - average value; Sx (or σ) - mean square deviation (or standard deviation); m - average error (or mean error); Cv (or V) - or variation coefficient [V= (σ/X)100%]; min…
